# Supplementary material
Source: MDPI journal article supplement (https://www.mdpi.com/2072-4292/14/10/2467)
Supplement: s1 [file s1]

**Table S1.** Regression equation between environmental factors and PUE in each sub-regions (annual averaged air temperature ( $T_{\text{mean}}$ ), net radiation ( $R_n$ ), wind velocity (U), relative humidity (RH), and soil moisture (SM) , respectively).

| Sub-Regions     | Regression Function                                                                                                |                       |
|-----------------|--------------------------------------------------------------------------------------------------------------------|-----------------------|
| Arid            | $\text{PUE} = -0.048 * T_{\text{mean}} - 0.0001 * R_n - 0.135 * U - 0.012 * \text{RH} + 0.065 * \text{SM} + 3.472$ | $R = 0.63, P < 0.001$ |
| Transition zone | $\text{PUE} = 0.011 * T_{\text{mean}} + 0.0001 * R_n - 0.044 * U - 0.001 * \text{RH} - 0.061 * \text{SM} + 2.13$   | $R = 0.90, P < 0.001$ |
| Humid           | $\text{PUE} = -0.032 * T_{\text{mean}} + 0.001 * R_n - 0.236 * U + 0.006 * \text{RH} - 0.071 * \text{SM} + 2.27$   | $R = 0.93, P < 0.001$ |
